# Supplementary material for: Analyses of amplified fragment length polymorphisms (AFLP) indicate rapid radiation of Diospyros species (Ebenaceae) endemic to New Caledonia
Source: PubMed Central journal article supplement (PMC3881503; doi:10.1186/1471-2148-13-269), 2013-12-12
Supplement: 1471-2148-13-269-S1.pdf [file 1471-2148-13-269-S1.pdf]

K = 2  
 $\Delta K = 642.5$

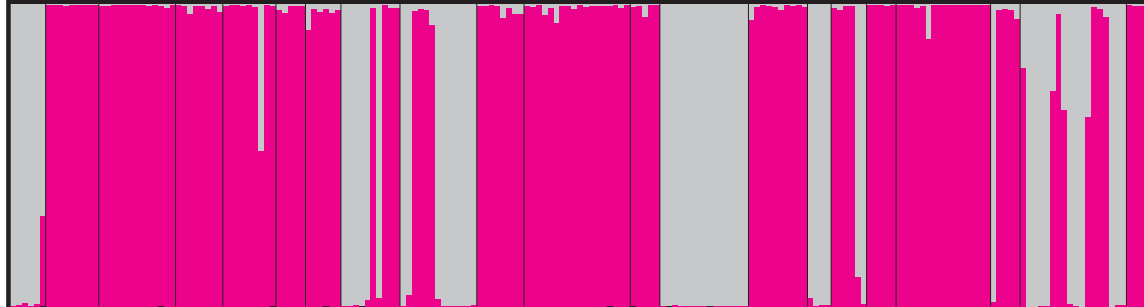

K = 3  
 $\Delta K = 36.3$

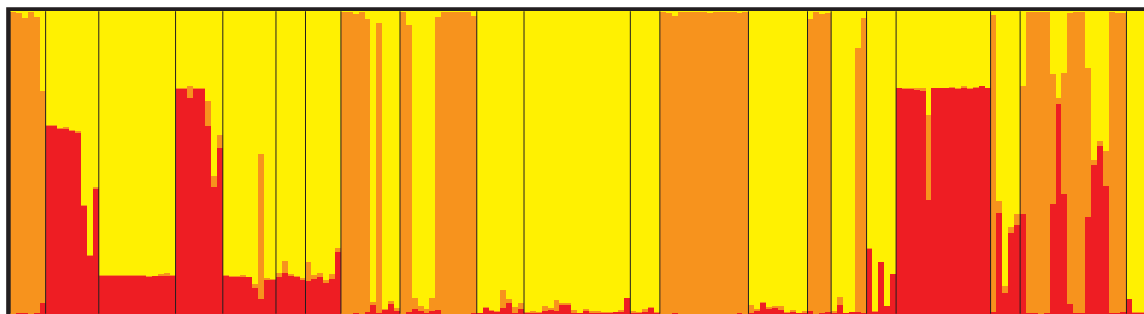

K = 6  
 $\Delta K = 63.1$

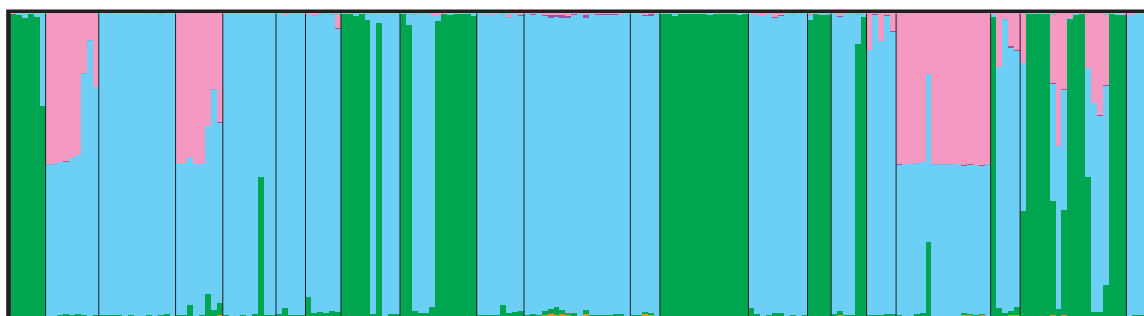

K = 16  
 $\Delta K = 6.1$

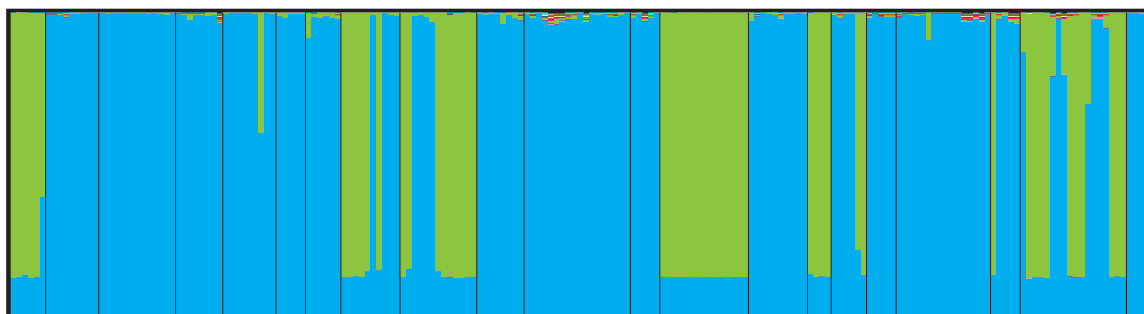

K = 21  
 $\Delta K = 34.7$

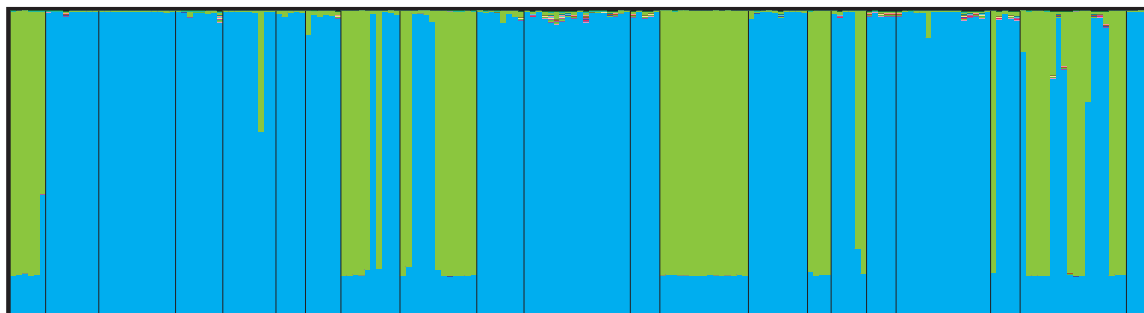

*D. calciphila*

*D. cherrieri*

*D. erudita*

*D. flavocarpa*

*D. glans*

*D. impolita*

*D. inexplorata*

*D. labillardierei*

*D. minimifolia*

*D. pancheri*

*D. parviflora*

*D. perplexa*

*D. pustulata*

*D. revolutissima*

*D. sp. Pic N'ga*

*D. tridentata*

*D. trisulca*

*D. umbrosa*

*D. veillonii*

*D. vieillardii*

*D. yahouensis*
