# Supplementary material for: Analyses of amplified fragment length polymorphisms (AFLP) indicate rapid radiation of Diospyros species (Ebenaceae) endemic to New Caledonia
Source: PubMed Central journal article supplement (PMC3881503; doi:10.1186/1471-2148-13-269), 2013-12-12

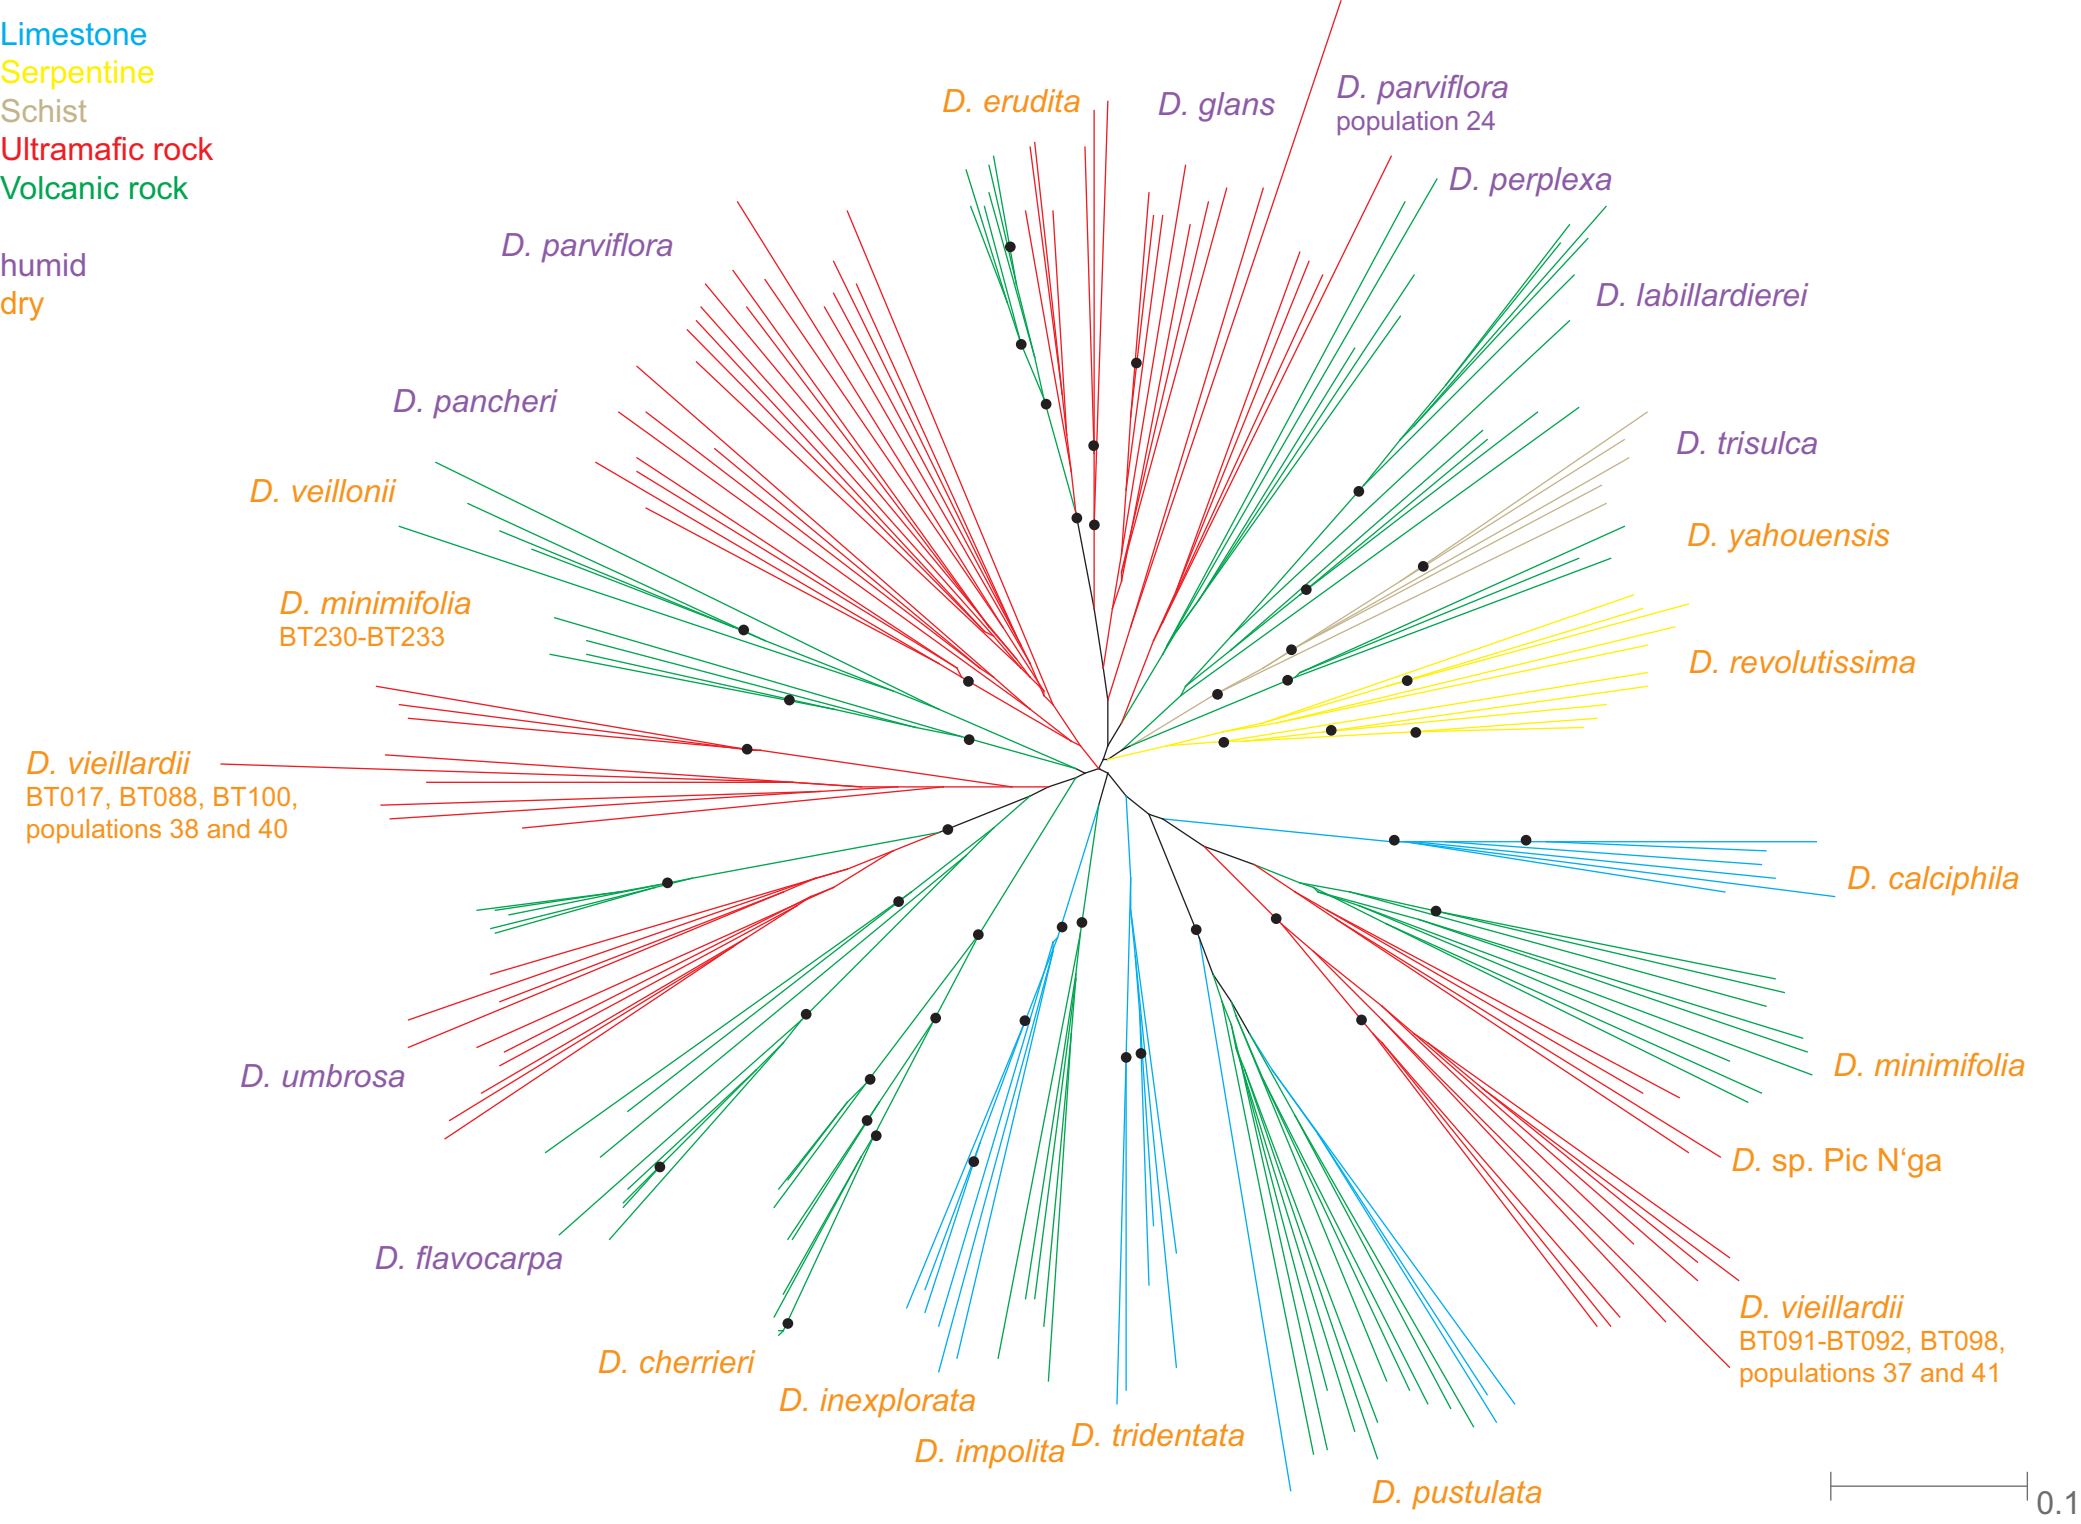

Supplement: 1471-2148-13-269-S3.pdf [file 1471-2148-13-269-S3.pdf]
